## Articles of interest in other COB journals

From *Journal of Cell Science*

### **KDP-1 is a nuclear envelope KASH protein required for cell-cycle progression**

Matthew D. McGee, Igor Stagljar and Daniel A. Starr

McGee, M. D. et al. 2009. *J. Cell Sci.* doi:10.1242/jcs.051607

### **Identification of a novel mouse P4-ATPase family member highly expressed during spermatogenesis**

Peng Xu, Juha Okkeri, Susanne Hanisch, Rui-Ying Hu, Qin Xu, Thomas Günther Pomorski and Xiao-Yan Ding

Xu, P. et al. 2009. *J. Cell Sci.* doi:10.1242/jcs.047423
